# Supplementary material for: Investigation of Flavonoid Scaffolds as DAX1 Inhibitors against Ewing Sarcoma through Pharmacoinformatic and Dynamic Simulation Studies
Source: MDPI journal article supplement (doi:10.3390/ijms24119332), 2023-05-26
Supplement: s1 [file s1]

## Supporting Information

### Investigation of flavonoid scaffolds as DAX1 inhibitors against Ewing sarcoma through pharmacoinformatic and dynamic simulation studies

Muhammad Yasir<sup>1</sup>, Jinyoung Park<sup>1</sup>, Eun-Taek Han<sup>2</sup>, Won Sun Park<sup>3</sup>, Jin-Hee Han<sup>2</sup>, Yong-Soo Kwon<sup>4</sup>, Hee-Jae Lee<sup>1</sup>, Mubashir Hassan<sup>5</sup>, Andrzej Kloczkowski<sup>5</sup> Wanjoo Chun<sup>1,\*</sup>

<sup>1</sup>Department of Pharmacology, Kangwon National University School of Medicine, Chuncheon, 24341, Republic of Korea.

<sup>2</sup>Department of Medical Environmental Biology and Tropical Medicine, Kangwon National University School of Medicine, Chuncheon, 24341, Republic of Korea.

<sup>3</sup>Department of Physiology, Kangwon National University School of Medicine, Chuncheon, 24341, Republic of Korea.

<sup>4</sup>College of Pharmacy, Kangwon National University School of Medicine, Chuncheon, 24341, Republic of Korea.

<sup>5</sup>The Steve and Cindy Rasmussen Institute for Genomic Medicine at Nationwide Children's Hospital, Columbus, OH 43205, USA

**Corresponding author:** Dr. Wanjoo Chun, Department of Pharmacology Kangwon National University School of Medicine, Email: [wchun@kangwon.ac.kr](mailto:wchun@kangwon.ac.kr), Phone: 82-33-250-8853.

**Table S1.** ES network-associated genes are predicted in this table with association type and scoring values.

| Sr no | Gene           | Gene ID  | Score | Association Type  | PMID     | PMID Year |
|-------|----------------|----------|-------|-------------------|----------|-----------|
| 1     | VIPR1          | 7433     | 0.01  | Biomarker         | 10188714 | 1999      |
| 2     | H4C13          | 8368     | 0.01  | AlteredExpression | 23185447 | 2012      |
| 3     | SMUG1          | 23583    | 0.02  | Biomarker         | 29100369 | 2017      |
| 4     | KCMF1          | 56888    | 0.01  | Biomarker         | 16314831 | 2006      |
| 5     | CD99           | 4267     | 0.1   | Biomarker         | 10492040 | 1999      |
| 6     | ERG            | 2078     | 0.09  | GeneticVariation  | 9049824  | 1997      |
| 7     | FGF2           | 2247     | 0.02  | Biomarker         | 15310753 | 2004      |
| 8     | EWSR1          | 2130     | 0.1   | GeneticVariation  | 17163154 | 2006      |
| 9     | H4C15          | 554313   | 0.01  | AlteredExpression | 23185447 | 2012      |
| 10    | H4C2           | 8366     | 0.01  | AlteredExpression | 23185447 | 2012      |
| 11    | CD274          | 29126    | 0.01  | AlteredExpression | 29445891 | 2018      |
| 12    | KCNN2          | 3781     | 0.01  | Biomarker         | 23185447 | 2012      |
| 13    | GRP            | 2922     | 0.01  | Biomarker         | 31264078 | 2019      |
| 14    | LIP1           | 149998   | 0.01  | Biomarker         | 23291981 | 2013      |
| 15    | H4C1           | 8359     | 0.01  | AlteredExpression | 23185447 | 2012      |
| 16    | EWSR1          | 2130     | 0.1   | GeneticVariation  | 27766786 | 2016      |
| 17    | EWSR1          | 2130     | 0.1   | Biomarker         | 25092916 | 2014      |
| 18    | ERG            | 2078     | 0.09  | AlteredExpression | 22287547 | 2012      |
| 19    | BMI1           | 648      | 0.01  | Biomarker         | 18701473 | 2008      |
| 20    | ERG            | 2078     | 0.09  | AlteredExpression | 23494411 | 2013      |
| 21    | ECRG4          | 84417    | 0.01  | Biomarker         | 23185447 | 2012      |
| 22    | FLI1           | 2313     | 0.08  | Biomarker         | 23494411 | 2013      |
| 23    | TP63           | 8626     | 0.01  | AlteredExpression | 18769338 | 2008      |
| 24    | EWSR1          | 2130     | 0.1   | Biomarker         | 15659957 | 2005      |
| 25    | CHGA           | 1113     | 0.01  | Biomarker         | 10492040 | 1999      |
| 26    | CD99           | 4267     | 0.1   | GeneticVariation  | 16196395 | 2005      |
| 27    | EWSR1          | 2130     | 0.1   | Biomarker         | 21403840 | 2011      |
| 28    | EWSR1          | 2130     | 0.1   | GeneticVariation  | 22420726 | 2012      |
| 29    | LDLOC1         | 23641    | 0.01  | Biomarker         | 23185447 | 2012      |
| 30    | EWSR1          | 2130     | 0.1   | GeneticVariation  | 21653923 | 2011      |
| 31    | ENO2           | 2026     | 0.02  | AlteredExpression | 31264078 | 2019      |
| 32    | EWSR1          | 2130     | 0.1   | Biomarker         | 15877528 | 2005      |
| 33    | FOLH1          | 2346     | 0.01  | AlteredExpression | 31524682 | 2020      |
| 34    | EWSR1          | 2130     | 0.1   | AlteredExpression | 10565682 | 1999      |
| 35    | EWSR1          | 2130     | 0.1   | GeneticVariation  | 10888417 | 2000      |
| 36    | PAX3           | 5077     | 0.01  | AlteredExpression | 9169092  | 1997      |
| 37    | FLI1           | 2313     | 0.08  | Biomarker         | 19411158 | 2009      |
| 38    | EWSR1          | 2130     | 0.1   | GeneticVariation  | 16314831 | 2006      |
| 39    | EWSR1          | 2130     | 0.1   | AlteredExpression | 23760780 | 2013      |
| 40    | EWSR1          | 2130     | 0.1   | Biomarker         | 9178886  | 1997      |
| 41    | KLRC4-<br>KLK1 | 1.01E+08 | 0.01  | Biomarker         | 22355347 | 2012      |
| 42    | FOXO4          | 4303     | 0.01  | GeneticVariation  | 25007147 | 2014      |
| 43    | EWSR1          | 2130     | 0.1   | Biomarker         | 19144156 | 2009      |
| 44    | CIC            | 23152    | 0.02  | Biomarker         | 28864350 | 2017      |
| 45    | EWSR1          | 2130     | 0.1   | GeneticVariation  | 17610475 | 2007      |
| 46    | HPR            | 3250     | 0.01  | Biomarker         | 15289350 | 2004      |
| 47    | CDKN2A         | 1029     | 0.02  | AlteredExpression | 11520274 | 2001      |
| 48    | EWSR1          | 2130     | 0.1   | Biomarker         | 31831298 | 2020      |
| 49    | MYC            | 4609     | 0.01  | Biomarker         | 19725831 | 2010      |
| 50    | NR0B1          | 190      | 0.02  | AlteredExpression | 23185447 | 2012      |
| 51    | ENO2           | 2026     | 0.02  | GeneticVariation  | 10492040 | 1999      |
| 52    | PIK3CB         | 5291     | 0.01  | Biomarker         | 10582694 | 1999      |
| 53    | H4C3           | 8364     | 0.01  | AlteredExpression | 23185447 | 2012      |

|     |         |        |      |                   |          |      |
|-----|---------|--------|------|-------------------|----------|------|
| 54  | ABCC1   | 4363   | 0.01 | AlteredExpression | 16049968 | 2006 |
| 55  | FLI1    | 2313   | 0.08 | Biomarker         | 28296680 | 2017 |
| 56  | EWSR1   | 2130   | 0.1  | Biomarker         | 24293381 | 2014 |
| 57  | RPE65   | 6121   | 0.01 | AlteredExpression | 18769338 | 2008 |
| 58  | IL6     | 3569   | 0.01 | Biomarker         | 25092916 | 2014 |
| 59  | TP53    | 7157   | 0.01 | GeneticVariation  | 25010205 | 2014 |
| 60  | VIPR2   | 7434   | 0.01 | AlteredExpression | 10188714 | 1999 |
| 61  | EWSR1   | 2130   | 0.1  | AlteredExpression | 22323082 | 2012 |
| 62  | IGF1R   | 3480   | 0.02 | Biomarker         | 10582694 | 1999 |
| 63  | CD99    | 4267   | 0.1  | Biomarker         | 19411158 | 2009 |
| 64  | H4C9    | 8294   | 0.01 | AlteredExpression | 23185447 | 2012 |
| 65  | IGF1R   | 3480   | 0.02 | Biomarker         | 23760780 | 2013 |
| 66  | SMARCB1 | 6598   | 0.01 | Biomarker         | 19725831 | 2010 |
| 67  | IGF1    | 3479   | 0.03 | Biomarker         | 23760780 | 2013 |
| 68  | EWSR1   | 2130   | 0.1  | Biomarker         | 17762498 | 2007 |
| 69  | CD99    | 4267   | 0.1  | AlteredExpression | 16096383 | 2005 |
| 70  | STAG2   | 10735  | 0.01 | GeneticVariation  | 25010205 | 2014 |
| 71  | EWSR1   | 2130   | 0.1  | Biomarker         | 12700668 | 2003 |
| 72  | ERG     | 2078   | 0.09 | Biomarker         | 24293381 | 2014 |
| 73  | EWSR1   | 2130   | 0.1  | GeneticVariation  | 16096383 | 2005 |
| 74  | EWSR1   | 2130   | 0.1  | GeneticVariation  | 21267687 | 2011 |
| 75  | FLI1    | 2313   | 0.08 | GeneticVariation  | 9704926  | 1998 |
| 76  | BRCA2   | 675    | 0.01 | GeneticVariation  | 25010205 | 2014 |
| 77  | EWSR1   | 2130   | 0.1  | Biomarker         | 19411158 | 2009 |
| 78  | CTNNB1  | 1499   | 0.01 | Biomarker         | 15266408 | 2004 |
| 79  | ALK     | 238    | 0.01 | Biomarker         | 11284039 | 2001 |
| 80  | CD99    | 4267   | 0.1  | AlteredExpression | 16314831 | 2006 |
| 81  | H4C11   | 8363   | 0.01 | AlteredExpression | 23185447 | 2012 |
| 82  | SMUG1   | 23583  | 0.02 | Biomarker         | 30508968 | 2018 |
| 83  | ERG     | 2078   | 0.09 | GeneticVariation  | 11471459 | 2001 |
| 84  | EWSR1   | 2130   | 0.1  | GeneticVariation  | 15049010 | 2004 |
| 85  | EWSR1   | 2130   | 0.1  | Biomarker         | 9836070  | 1998 |
| 86  | PARP1   | 142    | 0.01 | Biomarker         | 22287547 | 2012 |
| 87  | ASAH1   | 427    | 0.01 | AlteredExpression | 15289350 | 2004 |
| 88  | CD99    | 4267   | 0.1  | AlteredExpression | 23760780 | 2013 |
| 89  | CD99    | 4267   | 0.1  | Biomarker         | 10416880 | 1999 |
| 90  | CD99    | 4267   | 0.1  | AlteredExpression | 21267687 | 2011 |
| 91  | ERG     | 2078   | 0.09 | Biomarker         | 10561219 | 1999 |
| 92  | FLI1    | 2313   | 0.08 | Biomarker         | 23185447 | 2012 |
| 93  | EWSR1   | 2130   | 0.1  | AlteredExpression | 24312454 | 2013 |
| 94  | GFAP    | 2670   | 0.01 | AlteredExpression | 28296680 | 2017 |
| 95  | H4C5    | 8367   | 0.01 | AlteredExpression | 23185447 | 2012 |
| 96  | S100A1  | 6271   | 0.01 | GeneticVariation  | 10492040 | 1999 |
| 97  | ERG     | 2078   | 0.09 | Biomarker         | 23185447 | 2012 |
| 98  | FLI1    | 2314   | 0.03 | Biomarker         | 28296680 | 2017 |
| 99  | EWSR1   | 2130   | 0.1  | Biomarker         | 25755803 | 2015 |
| 100 | EWSR1   | 2130   | 0.1  | Biomarker         | 17272319 | 2007 |
| 101 | EWSR1   | 2130   | 0.1  | Biomarker         | 27627705 | 2016 |
| 102 | CEACAM5 | 1048   | 0.01 | Biomarker         | 11508817 | 2001 |
| 103 | EWSR1   | 2130   | 0.1  | GeneticVariation  | 16196395 | 2005 |
| 104 | CDK4    | 1019   | 0.01 | Biomarker         | 9393981  | 1997 |
| 105 | EWSR1   | 2130   | 0.1  | Biomarker         | 8084618  | 1994 |
| 106 | CD99    | 4267   | 0.1  | Biomarker         | 20182342 | 2010 |
| 107 | NPL     | 80896  | 0.01 | GeneticVariation  | 25733708 | 2015 |
| 108 | NUTM1   | 256646 | 0.01 | Biomarker         | 30453921 | 2018 |
| 109 | EWSR1   | 2130   | 0.1  | GeneticVariation  | 9704926  | 1998 |
| 110 | CAV1    | 857    | 0.02 | AlteredExpression | 23185447 | 2012 |
| 111 | EWSR1   | 2130   | 0.1  | GeneticVariation  | 10078922 | 1999 |

|     |             |          |      |                   |          |      |
|-----|-------------|----------|------|-------------------|----------|------|
| 112 | PIK3CD      | 5293     | 0.01 | Biomarker         | 10582694 | 1999 |
| 113 | EWSR1       | 2130     | 0.1  | GeneticVariation  | 16052075 | 2005 |
| 114 | EWSR1       | 2130     | 0.1  | Biomarker         | 15930281 | 2005 |
| 115 | CIC         | 23152    | 0.02 | GeneticVariation  | 25007147 | 2014 |
| 116 | BCOR        | 54880    | 0.01 | GeneticVariation  | 28864350 | 2017 |
| 117 | EWSR1       | 2130     | 0.1  | Biomarker         | 25010205 | 2014 |
| 118 | FLII        | 2313     | 0.08 | GeneticVariation  | 9049825  | 1997 |
| 119 | EWSR1       | 2130     | 0.1  | GeneticVariation  | 9049825  | 1997 |
| 120 | B3GAT1      | 27087    | 0.01 | Biomarker         | 10492040 | 1999 |
| 121 | ERG         | 2078     | 0.09 | Biomarker         | 9836070  | 1998 |
| 122 | EWSR1       | 2130     | 0.1  | Biomarker         | 11471459 | 2001 |
| 123 | EWSR1       | 2130     | 0.1  | Biomarker         | 16721801 | 2006 |
| 124 | EWSR1       | 2130     | 0.1  | AlteredExpression | 10976720 | 2000 |
| 125 | EWSR1       | 2130     | 0.1  | Biomarker         | 10949935 | 2000 |
| 126 | EWSR1       | 2130     | 0.1  | AlteredExpression | 18591936 | 2008 |
| 127 | EWSR1       | 2130     | 0.1  | Biomarker         | 15491164 | 2004 |
| 128 | CAV1        | 857      | 0.02 | Biomarker         | 21106507 | 2010 |
| 129 | EWSR1       | 2130     | 0.1  | Biomarker         | 28296680 | 2017 |
| 130 | EWSR1       | 2130     | 0.1  | Biomarker         | 11284039 | 2001 |
| 131 | CD99        | 4267     | 0.1  | Biomarker         | 28864350 | 2017 |
| 132 | FLII        | 2314     | 0.03 | GeneticVariation  | 9049824  | 1997 |
| 133 | MYCN        | 4613     | 0.01 | Biomarker         | 19725831 | 2010 |
| 134 | EWSR1       | 2130     | 0.1  | Biomarker         | 19725831 | 2010 |
| 135 | UVRAG       | 7405     | 0.01 | AlteredExpression | 18769338 | 2008 |
| 136 | EWSR1       | 2130     | 0.1  | Biomarker         | 12908547 | 2003 |
| 137 | CASP3       | 836      | 0.01 | AlteredExpression | 10582694 | 1999 |
| 138 | EWSR1       | 2130     | 0.1  | Biomarker         | 22287547 | 2012 |
| 139 | WRN         | 7486     | 0.01 | GeneticVariation  | 31831298 | 2020 |
| 140 | EWSR1       | 2130     | 0.1  | Biomarker         | 10088552 | 1999 |
| 141 | EWSR1       | 2130     | 0.1  | Biomarker         | 16740692 | 2006 |
| 142 | EWSR1       | 2130     | 0.1  | GeneticVariation  | 20513536 | 2010 |
| 143 | FLII        | 2314     | 0.03 | GeneticVariation  | 9049825  | 1997 |
| 144 | EWSR1       | 2130     | 0.1  | AlteredExpression | 23185447 | 2012 |
| 145 | DLEU7       | 220107   | 0.01 | Biomarker         | 10492040 | 1999 |
| 146 | CDKN2A      | 1029     | 0.02 | Biomarker         | 18701473 | 2008 |
| 147 | ABCB1       | 5243     | 0.01 | AlteredExpression | 16049968 | 2006 |
| 148 | MTAP        | 4507     | 0.01 | Biomarker         | 29243509 | 2018 |
| 149 | IGFBP3      | 3486     | 0.01 | Biomarker         | 23185447 | 2012 |
| 150 | VIP         | 7432     | 0.01 | Biomarker         | 10188714 | 1999 |
| 151 | H4C12       | 8362     | 0.01 | AlteredExpression | 23185447 | 2012 |
| 152 | EWSR1       | 2130     | 0.1  | Biomarker         | 16157025 | 2005 |
| 153 | EWSR1       | 2130     | 0.1  | Biomarker         | 18088234 | 2008 |
| 154 | EWSR1       | 2130     | 0.1  | GeneticVariation  | 17557870 | 2007 |
| 155 | H4C6        | 8361     | 0.01 | AlteredExpression | 23185447 | 2012 |
| 156 | COMMD3-BMI1 | 1.01E+08 | 0.01 | Biomarker         | 18701473 | 2008 |
| 157 | SPARC       | 6678     | 0.01 | AlteredExpression | 21106507 | 2010 |
| 158 | EWSR1       | 2130     | 0.1  | GeneticVariation  | 10493837 | 1999 |
| 159 | FLII        | 2313     | 0.08 | GeneticVariation  | 19144156 | 2009 |
| 160 | EWSR1       | 2130     | 0.1  | AlteredExpression | 23494411 | 2013 |
| 161 | EWSR1       | 2130     | 0.1  | AlteredExpression | 25688366 | 2015 |
| 162 | EWSR1       | 2130     | 0.1  | GeneticVariation  | 27180056 | 2016 |
| 163 | CD99        | 4267     | 0.1  | Biomarker         | 28296680 | 2017 |
| 164 | PIK3CA      | 5290     | 0.01 | Biomarker         | 10582694 | 1999 |
| 165 | H4C4        | 8360     | 0.01 | AlteredExpression | 23185447 | 2012 |
| 166 | PDGFC       | 56034    | 0.01 | Biomarker         | 12700668 | 2003 |
| 167 | TGFBR2      | 7048     | 0.01 | Biomarker         | 23185447 | 2012 |
| 168 | IGF1        | 3479     | 0.03 | Biomarker         | 8054516  | 1994 |

|     |          |          |      |                               |          |      |
|-----|----------|----------|------|-------------------------------|----------|------|
| 169 | EWSR1    | 2130     | 0.1  | Biomarker                     | 20308673 | 2010 |
| 170 | EWSR1    | 2130     | 0.1  | GeneticVariation              | 29581854 | 2018 |
| 171 | CCND1    | 595      | 0.01 | Biomarker                     | 9393981  | 1997 |
| 172 | KRT20    | 54474    | 0.01 | Biomarker                     | 20182342 | 2010 |
| 173 | EWSR1    | 2130     | 0.1  | Biomarker                     | 11037342 | 2000 |
| 174 | PIK3CG   | 5294     | 0.01 | Biomarker                     | 10582694 | 1999 |
| 175 | SST      | 6750     | 0.01 | AlteredExpression             | 10231868 | 1999 |
| 176 | EWSR1    | 2130     | 0.1  | Biomarker                     | 16556028 | 2005 |
| 177 | CKAP4    | 10970    | 0.01 | AlteredExpression             | 18769338 | 2008 |
| 178 | EWSR1    | 2130     | 0.1  | Biomarker                     | 10492040 | 1999 |
| 179 | EWSR1    | 2130     | 0.1  | AlteredExpression             | 17438102 | 2007 |
| 180 | EWSR1    | 2130     | 0.1  | GeneticVariation              | 20473914 | 2011 |
| 181 | IGF1     | 3479     | 0.03 | Biomarker                     | 10582694 | 1999 |
| 182 | FEV      | 54738    | 0.01 | GeneticVariation              | 31831298 | 2020 |
| 183 | FLI1     | 2313     | 0.08 | Biomarker                     | 9836070  | 1998 |
| 184 | EWSR1    | 2130     | 0.1  | Biomarker                     | 22429598 | 2012 |
| 185 | H4C14    | 8370     | 0.01 | AlteredExpression             | 23185447 | 2012 |
| 186 | BCL2     | 596      | 0.01 | Biomarker                     | 30348635 | 2019 |
| 187 | EWSR1    | 2130     | 0.1  | Biomarker                     | 22879388 | 2012 |
| 188 | H3P10    | 1.15E+08 | 0.01 | AlteredExpression             | 18701473 | 2008 |
| 189 | FGF2     | 2247     | 0.02 | PosttranslationalModification | 18263590 | 2008 |
| 190 | H4C8     | 8365     | 0.01 | AlteredExpression             | 23185447 | 2012 |
| 191 | CD34     | 947      | 0.01 | Biomarker                     | 17369866 | 2007 |
| 192 | S100B    | 6285     | 0.01 | GeneticVariation              | 10492040 | 1999 |
| 193 | DHX9     | 1660     | 0.01 | Biomarker                     | 16740692 | 2006 |
| 194 | ERG      | 2078     | 0.09 | Biomarker                     | 21519790 | 2011 |
| 195 | NR0B1    | 190      | 0.02 | Biomarker                     | 18591936 | 2008 |
| 196 | EWSR1    | 2130     | 0.1  | GeneticVariation              | 9049824  | 1997 |
| 197 | EWSR1    | 2130     | 0.1  | GeneticVariation              | 21106507 | 2010 |
| 198 | H4-16    | 121504   | 0.01 | AlteredExpression             | 23185447 | 2012 |
| 199 | SLFN11   | 91607    | 0.01 | AlteredExpression             | 25733708 | 2015 |
| 200 | C17orf97 | 400566   | 0.01 | Biomarker                     | 20182342 | 2010 |
| 201 | EWSR1    | 2130     | 0.1  | Biomarker                     | 11519035 | 2001 |
| 202 | KLRK1    | 22914    | 0.01 | Biomarker                     | 22355347 | 2012 |

**Table S2.** Molecular docking score of initial 132 compounds with PubChem CID and respective 2D images.

| Sr no | Compounds            | CDocker energy | CDocker interaction energy | PubChem CID | 2D images                                                                             |
|-------|----------------------|----------------|----------------------------|-------------|---------------------------------------------------------------------------------------|
| 1     | Luteolin             | -48.5298       | -45.7084                   | 5280445     | 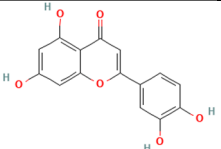   |
| 2     | Quercetin            | -45.4411       | -53.2616                   | 5280343     |    |
| 3     | Kaempferol           | -41.6088       | -53.4284                   | 5280863     |    |
| 4     | Flavopiridol         | -40.5963       | -40.5658                   | 5287969     |   |
| 5     | Epigallocatechin     | -40.3689       | -38.8335                   | 72277       |  |
| 6     | Taxifolin            | -39.8385       | -43.5986                   | 439533      |  |
| 7     | Diosmetin            | -39.809        | -43.5293                   | 5281612     |  |
| 8     | Fisetin              | -39.6941       | -49.2916                   | 5281614     |  |
| 9     | 7_8-Dihydroxyflavone | -39.5863       | -40.1859                   | 1880        |  |

|    |                  |          |          |         |                                                                                       |
|----|------------------|----------|----------|---------|---------------------------------------------------------------------------------------|
| 10 | Scutellarein     | -39.4315 | -37.5446 | 5281697 | 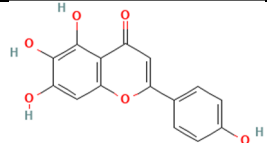   |
| 11 | Phloretin        | -39.1557 | -43.8202 | 4788    |    |
| 12 | Apigenin         | -38.7233 | -41.5549 | 5280443 |    |
| 13 | S9287_Genkwanin  | -38.0676 | -43.5516 | 5281617 |    |
| 14 | Baicalein        | -37.931  | -35.7685 | 5281605 |    |
| 15 | Genistein        | -37.9187 | -42.312  | 5280961 |  |
| 16 | Hesperetin       | -37.2704 | -43.6884 | 72281   |  |
| 17 | Daidzein         | -37.1637 | -38.8963 | 5281708 |  |
| 18 | S3836_6-Gingerol | -36.8494 | -39.1428 | 442793  |  |
| 19 | Naringenin       | -36.7988 | -41.7884 | 932     |  |
| 20 | Equol            | -36.6572 | -41.799  | 91469   |  |

|    |                            |          |          |          |                                                                                       |
|----|----------------------------|----------|----------|----------|---------------------------------------------------------------------------------------|
| 21 | S5380_7-Hydroxyflavone     | -36.2863 | -38.7844 | 5281894  | 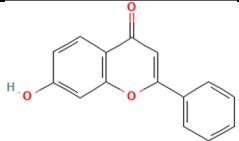   |
| 22 | Loureirin_B                | -36.0644 | -45.1739 | 189670   |    |
| 23 | 2-D08                      | -36.0278 | -34.6996 | 22507438 |    |
| 24 | ( $\square$ )-Equol        | -34.5731 | -39.712  | 382975   |    |
| 25 | Loureirin_A                | -34.3043 | -41.8647 | 5319081  |   |
| 26 | S9122_Tectorigenin         | -33.8531 | -43.1069 | 5281811  |  |
| 27 | S9123_Eriodictyol          | -33.1403 | -38.8122 | 440735   |  |
| 28 | S9038_Calycosin            | -33.1064 | -41.0947 | 5280448  |  |
| 29 | Hispidulin                 | -32.7102 | -39.7315 | 5281628  |  |
| 30 | S9378_4_5-Dihydroxyflavone | -32.679  | -34.9683 | 165521   |  |



|    |                           |          |          |         |                                                                                       |
|----|---------------------------|----------|----------|---------|---------------------------------------------------------------------------------------|
| 31 | S4937_4_-Hydroxychalcone  | -32.4074 | -38.3929 | 5282361 | 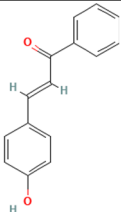   |
| 32 | S9048_(+)-Gallocatechin   | -32.385  | -37.7539 | 65084   |    |
| 33 | S9107_Glycitein           | -32.0008 | -41.5553 | 5317750 |    |
| 34 | S9110_Morin               | -30.6406 | -35.5764 | 5281670 |    |
| 35 | Biochanin_A               | -30.6199 | -38.0726 | 5280373 |   |
| 36 | S9440_Naringenin_chalcone | -30.3047 | -40.3001 | 5280960 |  |
| 37 | Pectolinarigenin          | -30.1523 | -42.3097 | 5320438 |  |
| 38 | Formononetin              | -29.7956 | -36.3391 | 5280378 |  |
| 39 | S9437_Echinatin           | -29.7129 | -39.4753 | 6442675 |  |

|    |                            |          |          |         |                                                                                       |
|----|----------------------------|----------|----------|---------|---------------------------------------------------------------------------------------|
| 40 | S9111_Isorhamnetin         | -29.678  | -46.7164 | 5281654 | 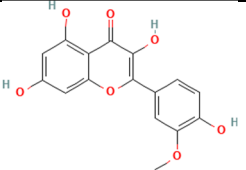   |
| 41 | S5548_7-Hydroxy-4-chromone | -29.2685 | -27.2261 | 5409279 |    |
| 42 | S9205_Hydroxygenkwanin     | -28.9535 | -34.8541 | 5318214 |    |
| 43 | Butein                     | -28.6049 | -36.3643 | 5281222 |    |
| 44 | S4723_(-)Epicatechin       | -28.2159 | -32.8692 | 72276   |  |
| 45 | (+)-Catechin               | -27.894  | -35.0282 | 9064    |  |
| 46 | Farrerol                   | -27.7669 | -33.6903 | 91144   |  |
| 47 | Galangin_3-methyl_ether    | -27.633  | -37.3358 | —       |  |
| 48 | S3846_Eupatilin            | -26.7569 | -43.7569 | 5273755 |  |

|    |                       |          |          |         |                                                                                       |
|----|-----------------------|----------|----------|---------|---------------------------------------------------------------------------------------|
| 49 | S9043_6-Shogaol       | -26.7403 | -34.7972 | 5281794 | 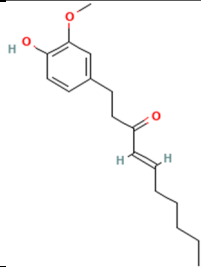   |
| 50 | Licochalcone_A        | -26.2474 | -47.0011 | 5318998 |    |
| 51 | Chrysin               | -25.2715 | -30.9232 | 5281607 |    |
| 52 | Pinocembrin           | -25.2236 | -33.2761 | 68071   |    |
| 53 | Acacetin              | -25.073  | -33.1322 | 5280442 |   |
| 54 | Corylin               | -24.8121 | -43.3809 | 5316097 |  |
| 55 | Hispidulin            | -24.5561 | -33.6978 | 5281628 |  |
| 56 | 3-Hydroxyphenylacetic | -24.3823 | -25.661  | 12122   |  |
| 57 | Isosakuranetin        | -24.0802 | -32.0848 | 160481  |  |

|    |                                |          |          |          |                                                                                       |
|----|--------------------------------|----------|----------|----------|---------------------------------------------------------------------------------------|
| 58 | 4_7-Dimethoxy-5-Hydroxyflavone | -24.0673 | -33.853  | 11511802 | 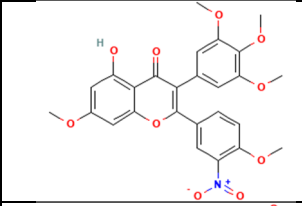   |
| 59 | Phenoxodiol                    | -23.9828 | -37.3348 | 219100   |    |
| 60 | S3929_Liquiritigenin           | -23.8663 | -29.0568 | 114829   |    |
| 61 | S3877_Lysionotin               | -23.1191 | -43.5881 | 160921   |    |
| 62 | S4743_Wogonin                  | -23.0372 | -31.7747 | 5281703  |    |
| 63 | S3879_kaempferide              | -23.0022 | -38.0133 | 5281666  |   |
| 64 | S9204_Oroxylin_A               | -22.9916 | -32.1963 | 5320315  |  |
| 65 | S3634_6-Hydroxyflavone         | -22.9186 | -26.7713 | 72279    |  |
| 66 | Isoliquiritigenin              | -22.8938 | -31.9716 | 638278   |  |
| 67 | Tectochrysin                   | -22.4827 | -29.7013 | 5281954  |  |

|    |                         |           |          |          |                                                                                       |
|----|-------------------------|-----------|----------|----------|---------------------------------------------------------------------------------------|
| 68 | Ipriflavone             | -22.1278  | -32.7714 | 3747     | 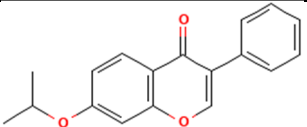   |
| 69 | S5529_Galangin          | -21.6262  | -34.3366 | 5281616  |    |
| 70 | S3875_Alpinetin         | -20-.9374 | -32.1682 | 154279   |    |
| 71 | S4790_3-Hydroxyflavone  | -20.6897  | -33.1733 | 11349    |    |
| 72 | S3679_Flavanone         | -20.6088  | -26.3532 | 10251    |   |
| 73 | 4_5_7-Trimethoxyflavone | -20.4558  | -35.4312 | 79730    |  |
| 74 | S3967_Flavone           | -20.4544  | -25.3732 | 10680    |  |
| 75 | Anhydroicaritin         | -20.3019  | -35.8563 | 14583584 |  |
| 76 | S3942_Cardamonin        | -19.9796  | -33.2601 | 641785   |  |

|    |                              |          |          |         |                                                                                       |
|----|------------------------------|----------|----------|---------|---------------------------------------------------------------------------------------|
| 77 | 4_7-Dimethoxyisoflavone      | -19.7538 | -32.5723 | 136419  | 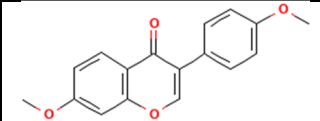   |
| 78 | 7-Methoxyisoflavone          | -19.4308 | -29.4646 | 638006  |    |
| 79 | 5_7-Dimethoxyflavone         | -19.3502 | -31.9309 | 88881   |    |
| 80 | S4763_4-Hydroxychalcone      | -19.2626 | -27.6329 | 5282361 |    |
| 81 | S4782_5-methoxyflavone       | -19.233  | -29.2379 | 94525   |   |
| 82 | Xanthone                     | -18.4706 | -23.3239 | 7020    |  |
| 83 | 5-Methyl-7-methoxyisoflavone | -18.2903 | -30.6319 | 2734290 |  |
| 84 | S9121_Irigenin               | -17.9964 | -38.2519 | 5464170 |  |
| 85 | S5600_Flavokawain_A          | -17.9156 | -36.8903 | 5355469 |  |

|    |                              |          |          |         |                                                                                       |
|----|------------------------------|----------|----------|---------|---------------------------------------------------------------------------------------|
| 86 | 2_-Hydroxy-2-methoxychalcone | -17.7422 | -29.9289 | 466234  | 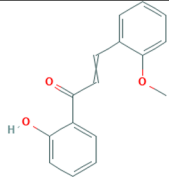   |
| 87 | 4_-Methoxychalcone           | -17.1169 | -28.8342 | 641818  |    |
| 88 | S9286_Neobavaisoflavone      | -16.9939 | -46.5358 | 5320053 |    |
| 89 | Chalcone                     | -16.9671 | -25.5922 | 637760  |    |
| 90 | S4765_Syringaldehyde         | -16.0628 | -23.4786 | 8655    |   |
| 91 | 2_-Hydroxyacetophenone       | -16.0206 | -18.7215 | 68490   |  |
| 92 | Sappanone_A                  | -15.9914 | -35.2132 | 9817274 |  |
| 93 | S3763_Cinnamaldehyde         | -15.7019 | -19.3291 | 637511  |  |

|     |                         |          |          |          |                                                                                       |
|-----|-------------------------|----------|----------|----------|---------------------------------------------------------------------------------------|
| 94  | S9412_Flavokawain_B     | -15.6029 | -30.2809 | 5356121  | 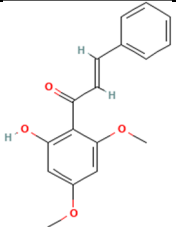   |
| 95  | S9080_Anhydroicaritin   | -15.4074 | -51.3542 | 14583584 |    |
| 96  | S3786_Glabridin         | -15.1108 | -34.942  | 124052   |    |
| 97  | S4940_Maltol            | -14.5467 | -30.2049 | 8369     |    |
| 98  | Flavoxate_HCL           | -14.4489 | -38.6933 | 441345   |   |
| 99  | S9288_Casticin          | -13.2626 | -35.6998 | 5315263  |  |
| 100 | 1_3_5-Trimethoxybenzene | -13.0566 | -23.3705 | 69301    |  |
| 101 | Deguelin                | -11.6169 | -39.3658 | 107935   |  |



|     |                            |          |          |          |                                                                                       |
|-----|----------------------------|----------|----------|----------|---------------------------------------------------------------------------------------|
| 102 | Hematoxylin                | -11.5116 | -32.9339 | 442514   | 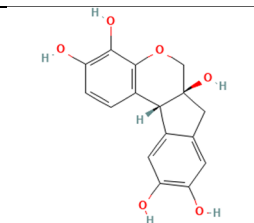   |
| 103 | 5_6_7-Trimethoxyflavone    | -11.4458 | -30.9628 | 442583   |    |
| 104 | S5158_alpha-Naphthoflavone | -11.4145 | -26.1406 | 11790    |    |
| 105 | S9421_Demethylnobiletin    | -10.6472 | -37.7838 | 358832   |    |
| 106 | Artemitin                  | -10.0914 | -41.2204 | 5320351  |   |
| 107 | S5469_Bavachin             | -9.75184 | -36.2419 | 14236566 |  |
| 108 | S9227_Sinensetin           | -9.53312 | -35.9903 | 145659   |  |
| 109 | S9428_Brazilin             | -8.84052 | -33.2891 | 73384    |  |
| 110 | S9113_Ononin               | -8.74301 | -43.518  | 442813   |  |

|     |                               |          |          |          |  |
|-----|-------------------------------|----------|----------|----------|--|
| 111 | S3878_Bavachinin              | -7.31819 | -37.2092 | 10337211 |  |
| 112 | S5456_Isobavachalcone         | -7.04957 | -37.3183 | 5281255  |  |
| 113 | Khellin                       | -6.89661 | -28.7396 | 3828     |  |
| 114 | p276-00                       | -6.61931 | -34.8407 | 23643975 |  |
| 115 | Nobiletin                     | -5.99673 | -39.2851 | 72344    |  |
| 116 | S9256_Isobavachin             | -5.60828 | -30.7641 | 193679   |  |
| 117 | S9270_Dracohodin_perochlorate | -5.44955 | -29.8582 | 74787691 |  |
| 118 | Tangeretin                    | -4.47936 | -34.1213 | 68077    |  |
| 119 | S9070_Isoxanthohumol          | -4.20233 | -35.8538 | 513197   |  |

|     |                             |          |          |         |                                                                                       |
|-----|-----------------------------|----------|----------|---------|---------------------------------------------------------------------------------------|
| 120 | S9409_Kavain                | -3.93303 | -27.7681 | 5281565 | 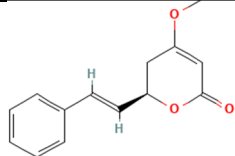   |
| 121 | Xanthohumol                 | -3.82703 | -37.5482 | 639665  |    |
| 122 | S9028_Cimifugin             | -2.36416 | -36.3477 | 441960  |    |
| 123 | S9053_Irisflorentin         | 5.22834  | -39.086  | 170569  |    |
| 124 | Rotenone                    | 8.60649  | -37.1983 | 6758    |   |
| 125 | S9387_Maackiain             | 12.5138  | -30.6821 | 91510   |  |
| 126 | 5a-Pregnane-3_20-dione      | 15.8379  | -34.506  | 92810   |  |
| 127 | Medroxyprogesterone_acetate | 17.8314  | -36.4916 | 6279    |  |
| 128 | S3784_Obacunone             | 21.4605  | -39.9202 | 119041  |  |

|     |                              |         |          |        |                                                                                      |
|-----|------------------------------|---------|----------|--------|--------------------------------------------------------------------------------------|
| 129 | 17-Hydroxyprogesterone       | 24.8666 | -34.6295 | 6238   | 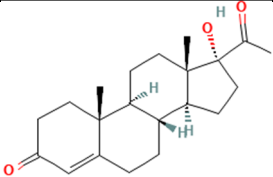  |
| 130 | S3635_Medroxyprogesterone    | 24.9057 | -33.9816 | 10631  |   |
| 131 | S9425_Trifolirhizin          | 26.1629 | -43.7232 | 442827 |   |
| 132 | S3800_Lycorine_hydrochloride | 39.801  | -28.2448 | 164943 |  |

**Table S3.** Chemoinformatic properties of screened compounds

| Name                            | H_acceptor | H_Donor | M_weight | Log_P | Rotatable_bonds | Aromatic_rings |
|---------------------------------|------------|---------|----------|-------|-----------------|----------------|
| Genistein                       | 5          | 3       | 270.237  | 2.14  | 1               | 2              |
| Daidzein                        | 4          | 2       | 254.238  | 2.382 | 1               | 2              |
| Silibinin                       | 10         | 5       | 482.436  | 2.592 | 4               | 3              |
| Silymarin                       | 10         | 5       | 482.436  | 2.592 | 4               | 3              |
| Tangeretin                      | 7          | 0       | 372.369  | 3.054 | 6               | 2              |
| Xanthone                        | 2          | 0       | 196.201  | 2.964 | 0               | 2              |
| Biochanin A                     | 5          | 2       | 284.263  | 2.366 | 2               | 2              |
| Diosmetin                       | 6          | 3       | 300.263  | 2.394 | 2               | 2              |
| Hematoxylin                     | 6          | 5       | 302.279  | 1.691 | 0               | 2              |
| Quercetin                       | 7          | 5       | 302.236  | 1.63  | 1               | 2              |
| Naringenin                      | 5          | 3       | 272.253  | 2.373 | 1               | 2              |
| Apigenin                        | 5          | 3       | 270.237  | 2.41  | 1               | 2              |
| Ipriflavone                     | 3          | 0       | 280.318  | 3.576 | 3               | 2              |
| Baicalein                       | 5          | 3       | 270.237  | 2.41  | 1               | 2              |
| Chrysin                         | 4          | 2       | 254.238  | 2.652 | 1               | 2              |
| Fisetin                         | 6          | 4       | 286.236  | 1.872 | 1               | 2              |
| Formononetin                    | 4          | 1       | 268.264  | 2.608 | 2               | 2              |
| Hesperetin                      | 6          | 3       | 302.279  | 2.357 | 2               | 2              |
| Kaempferol                      | 6          | 4       | 286.236  | 1.872 | 1               | 2              |
| Luteolin                        | 6          | 4       | 286.236  | 2.168 | 1               | 2              |
| Nobiletin                       | 8          | 0       | 402.395  | 3.038 | 7               | 2              |
| Phloretin                       | 5          | 4       | 274.269  | 2.757 | 4               | 2              |
| Isoliquiritigenin               | 4          | 3       | 256.253  | 2.975 | 3               | 2              |
| S3942 Cardamonin                | 4          | 2       | 270.28   | 3.201 | 4               | 2              |
| Medroxyprogesterone acetate     | 4          | 0       | 386.524  | 3.755 | 3               | 0              |
| Flavopiridol hydrochloride      | 6          | 3       | 438.301  | 3.49  | 2               | 2              |
| Equol                           | 3          | 2       | 242.27   | 3.211 | 1               | 2              |
| Daidzin                         | 9          | 5       | 416.378  | 0.452 | 4               | 2              |
| Taxifolin (Dihydroquercetin)    | 7          | 5       | 304.252  | 1.479 | 1               | 2              |
| Flavopiridol hydrochloride      | 6          | 3       | 401.84   | 3.108 | 2               | 2              |
| 17-Hydroxyprogesterone          | 3          | 1       | 330.461  | 3.124 | 1               | 0              |
| S4723 Epicatechin               | 6          | 5       | 290.268  | 2.021 | 1               | 2              |
| S4743 Wogonin                   | 5          | 2       | 284.263  | 2.636 | 2               | 2              |
| S3634 6-Hydroxyflavone          | 3          | 1       | 238.238  | 2.894 | 1               | 2              |
| S3635 Medroxyprogesterone       | 3          | 1       | 344.488  | 3.376 | 1               | 0              |
| S3679 Flavanone                 | 2          | 0       | 224.255  | 3.099 | 1               | 2              |
| Rotenone                        | 6          | 0       | 394.417  | 3.93  | 3               | 2              |
| S3941 Pinocembrin               | 4          | 2       | 256.253  | 2.615 | 1               | 2              |
| S3942 Cardamonin                | 4          | 2       | 270.28   | 3.201 | 4               | 2              |
| S3825 Glycitin                  | 10         | 5       | 446.404  | 0.436 | 5               | 2              |
| S3836 6-Gingerol                | 4          | 2       | 294.386  | 3.638 | 10              | 1              |
| S3784 Obacunone                 | 7          | 0       | 454.512  | 2.715 | 1               | 1              |
| S3786 Glabridin                 | 4          | 2       | 324.37   | 3.999 | 1               | 2              |
| 4',7-Dimethoxy-5-Hydroxyflavone | 5          | 1       | 298.29   | 2.861 | 3               | 2              |
| S3929 Liquiritigenin            | 4          | 2       | 256.253  | 2.615 | 1               | 2              |
| S3930 Liquiritin                | 9          | 5       | 418.394  | 0.686 | 4               | 2              |
| S3846 Eupatilin                 | 7          | 2       | 344.315  | 2.603 | 4               | 2              |
| S3875 Alpinetin                 | 4          | 1       | 270.28   | 2.841 | 2               | 2              |
| S3877 Lysionotin                | 7          | 2       | 344.315  | 2.603 | 4               | 2              |
| S3878 Bavachinin                | 4          | 1       | 338.397  | 4.698 | 4               | 2              |
| S3800 Lycorine hydrochloride    | 5          | 2       | 323.771  | 1.095 | 0               | 1              |
| p276-00                         | 6          | 3       | 438.301  | 3.49  | 3               | 2              |

|                                      |    |   |         |        |   |   |
|--------------------------------------|----|---|---------|--------|---|---|
| S3910 4',7-Dimethoxyisoflavone       | 4  | 0 | 282.291 | 2.833  | 3 | 2 |
| S3903 Lycorine                       | 5  | 2 | 287.31  | 0.713  | 0 | 1 |
| S4790 3-Hydroxyflavone               | 3  | 1 | 238.238 | 2.598  | 1 | 2 |
| S4782 5-methoxyflavone               | 3  | 0 | 252.265 | 3.12   | 2 | 2 |
| S4763 4-Hydroxychalcone              | 2  | 1 | 224.255 | 3.46   | 3 | 2 |
| S4765 Syringaldehyde                 | 4  | 1 | 182.173 | 1.314  | 3 | 1 |
| S3967 Flavone                        | 2  | 0 | 222.239 | 3.136  | 1 | 2 |
| S3879 kaempferide                    | 6  | 3 | 300.263 | 2.098  | 2 | 2 |
| S4940 Maltol                         | 3  | 1 | 126.11  | -0.222 | 0 | 0 |
| S4937 4'-Hydroxychalcone             | 2  | 1 | 224.255 | 3.46   | 3 | 2 |
| Flavoxate HCL                        | 5  | 0 | 427.921 | 4.876  | 6 | 2 |
| Butein                               | 5  | 4 | 272.253 | 2.734  | 3 | 2 |
| Xanthohumol                          | 5  | 3 | 354.396 | 4.816  | 6 | 2 |
| S3763 Cinnamaldehyde                 | 1  | 0 | 132.159 | 1.949  | 2 | 1 |
| Licochalcone A                       | 4  | 2 | 338.397 | 4.667  | 6 | 2 |
| 7,8-Dihydroxyflavone                 | 4  | 2 | 254.238 | 2.652  | 1 | 2 |
| Deguelin                             | 6  | 0 | 394.417 | 3.567  | 2 | 2 |
| S4722 (+)-Catechin                   | 6  | 5 | 290.268 | 2.021  | 1 | 2 |
| 2-D08                                | 5  | 3 | 270.237 | 2.41   | 1 | 2 |
| S5318 Acacetin                       | 5  | 2 | 284.263 | 2.636  | 2 | 2 |
| S5158 alpha-Naphthoflavone           | 2  | 0 | 272.297 | 4.044  | 1 | 3 |
| S5380 7-Hydroxyflavone               | 3  | 1 | 238.238 | 2.894  | 1 | 2 |
| S5456 Isobavachalcone                | 4  | 3 | 324.37  | 4.832  | 5 | 2 |
| S5469 Bavachin                       | 4  | 2 | 324.37  | 4.472  | 3 | 2 |
| S5529 Galangin                       | 5  | 3 | 270.237 | 2.114  | 1 | 2 |
| S9378 4',5-Dihydroxyflavone          | 4  | 2 | 254.238 | 2.652  | 1 | 2 |
| S9387 Maackiain                      | 5  | 1 | 284.263 | 2.467  | 0 | 2 |
| S9409 Kavain                         | 3  | 0 | 230.259 | 2.218  | 3 | 1 |
| S9412 Flavokawain B                  | 4  | 1 | 284.307 | 3.427  | 5 | 2 |
| S9421 Demethylnobiletin              | 8  | 1 | 388.368 | 2.812  | 6 | 2 |
| S9425 Trifolirhizin                  | 10 | 4 | 446.404 | 0.537  | 3 | 2 |
| S9428 Brazilin                       | 5  | 4 | 286.279 | 1.933  | 0 | 2 |
| S9437 Echinatin                      | 4  | 2 | 270.28  | 3.201  | 4 | 2 |
| S9438 Isosakuranetin                 | 5  | 2 | 286.279 | 2.599  | 2 | 2 |
| S9440 Naringenin chalcone            | 5  | 4 | 272.253 | 2.734  | 3 | 2 |
| Chalcone                             | 1  | 0 | 208.255 | 3.701  | 3 | 2 |
| 4'-Methoxychalcone                   | 2  | 0 | 238.281 | 3.685  | 4 | 2 |
| 2'-Hydroxy-2-methoxychalcone         | 3  | 1 | 254.281 | 3.443  | 4 | 2 |
| S9028 Cimifugin                      | 6  | 2 | 306.311 | 1.127  | 3 | 1 |
| S9043 6-Shogaol                      | 3  | 1 | 276.371 | 4.717  | 9 | 1 |
| S9053 Irisfloreantin                 | 8  | 0 | 386.352 | 2.569  | 5 | 2 |
| S9070 Isoxanthohumol                 | 5  | 2 | 354.396 | 4.456  | 4 | 2 |
| S9080 Anhydroicaritin                | 6  | 3 | 368.38  | 3.954  | 4 | 2 |
| S9088 Calycosin-7-O-beta-D-glucoside | 10 | 5 | 446.404 | 0.436  | 5 | 2 |
| S9107 Glycitein                      | 5  | 2 | 284.263 | 2.366  | 2 | 2 |
| S9110 Morin                          | 7  | 5 | 302.236 | 1.63   | 1 | 2 |
| S9111 Isorhamnetin                   | 7  | 4 | 316.262 | 1.856  | 2 | 2 |
| S9113 Ononin                         | 9  | 4 | 430.405 | 0.678  | 5 | 2 |
| S9120 Scutellarein                   | 6  | 4 | 286.236 | 2.168  | 1 | 2 |
| S9121 Iridigenin                     | 8  | 3 | 360.315 | 2.091  | 4 | 2 |
| S9122 Tectorigenin                   | 6  | 3 | 300.263 | 2.124  | 2 | 2 |
| S9123 Eriodictyol                    | 6  | 4 | 288.252 | 2.131  | 1 | 2 |
| S9139 5-Methyl-7-methoxyisoflavone   | 3  | 0 | 266.291 | 3.336  | 2 | 2 |

|                               |    |   |         |       |   |   |
|-------------------------------|----|---|---------|-------|---|---|
| S9173 Sec-O-Glucosylhamaudol  | 10 | 5 | 438.425 | 0.042 | 3 | 1 |
| S9204 Oroxylin A              | 5  | 2 | 284.263 | 2.636 | 2 | 2 |
| S9205 Hydroxygenkwanin        | 6  | 3 | 300.263 | 2.394 | 2 | 2 |
| S9227 Sinensetin              | 7  | 0 | 372.369 | 3.054 | 6 | 2 |
| S9250 Isosilybin              | 10 | 5 | 482.436 | 2.592 | 4 | 3 |
| S9256 Isobavachin             | 4  | 2 | 324.37  | 4.472 | 3 | 2 |
| S9270 Dracohodin perochlorate | 7  | 1 | 366.75  | 1.785 | 2 | 3 |
| S9286 Neobavaisoflavone       | 4  | 2 | 322.355 | 4.239 | 3 | 2 |
| S9287 Genkwanin               | 5  | 2 | 284.263 | 2.636 | 2 | 2 |
| S9288 Casticin                | 8  | 2 | 374.341 | 2.291 | 5 | 2 |
| S9298 Corylin                 | 4  | 1 | 320.339 | 3.412 | 1 | 2 |
| S5548 7-Hydroxy-4-chromone    | 3  | 1 | 162.142 | 1.146 | 0 | 1 |
| S5600 Flavokawain A           | 5  | 1 | 314.333 | 3.41  | 6 | 2 |
| S9038 Calycosin               | 5  | 2 | 284.263 | 2.366 | 2 | 2 |
| S9328 5,6,7-Trimethoxyflavone | 5  | 0 | 312.317 | 3.087 | 4 | 2 |
| S9375 2'-Hydroxyacetophenone  | 2  | 1 | 136.148 | 1.327 | 1 | 1 |
| Farrerol                      | 5  | 3 | 300.306 | 3.346 | 1 | 2 |
| 1,3,5-Trimethoxybenzene       | 3  | 0 | 168.19  | 1.78  | 3 | 1 |
| Khellin                       | 5  | 0 | 260.242 | 2.172 | 2 | 2 |
| Equol                         | 3  | 2 | 242.27  | 3.211 | 1 | 2 |
| 5a-Pregnane-3,20-dione        | 2  | 0 | 316.478 | 3.689 | 1 | 0 |
| 5,7-Dimethoxyflavone          | 4  | 0 | 282.291 | 3.103 | 3 | 2 |
| Loureirin A                   | 4  | 1 | 286.322 | 3.45  | 6 | 2 |
| Loureirin B                   | 5  | 1 | 316.348 | 3.434 | 7 | 2 |
| Pectolarigenin                | 6  | 2 | 314.289 | 2.619 | 3 | 2 |
| Tectochrysin                  | 4  | 1 | 268.264 | 2.878 | 2 | 2 |
| Hispidulin                    | 6  | 3 | 300.263 | 2.394 | 2 | 2 |
| Galangin 3-methyl ether       | 5  | 2 | 284.263 | 2.34  | 2 | 2 |
| Phenoxodiol (Hagin E)         | 3  | 2 | 240.254 | 3.029 | 1 | 2 |
| 4',5,7-Trimethoxyflavone      | 5  | 0 | 312.317 | 3.087 | 4 | 2 |
| 7-Methoxyisoflavone           | 3  | 0 | 252.265 | 2.85  | 2 | 2 |
| 3-Hydroxyphenylacetic acid    | 3  | 2 | 152.147 | 1.252 | 2 | 1 |
| Anhydroicaritin               | 6  | 2 | 368.38  | 3.437 | 2 | 2 |
| Sappanone A                   | 5  | 3 | 284.263 | 2.673 | 1 | 2 |
| Trans-Chalcone                | 1  | 0 | 208.255 | 3.701 | 3 | 2 |
| Artemitin                     | 8  | 1 | 388.368 | 2.516 | 6 | 2 |

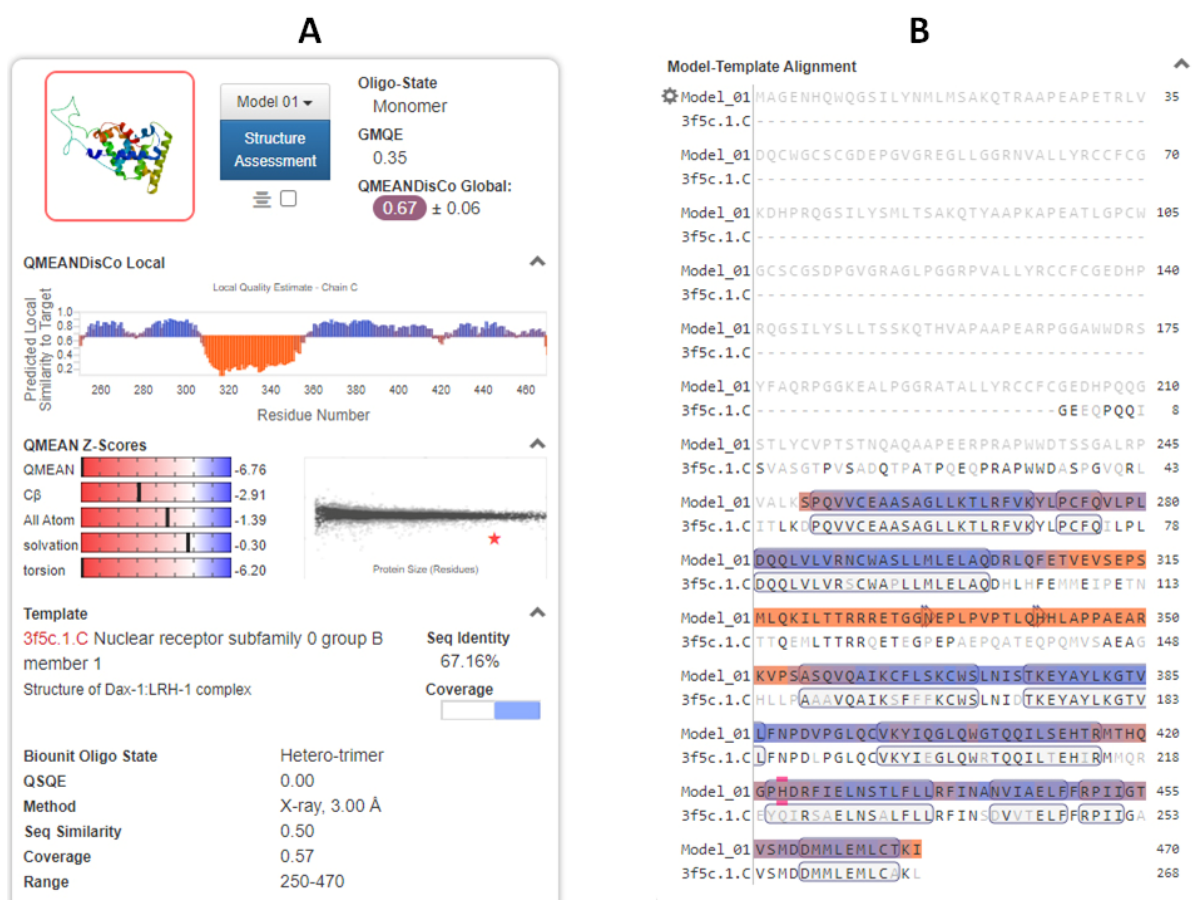

**Figure S1.** The figure shows the predicted DAX1 model in Figure A with 67.16 against the reference (PDB ID 3F5C) Mus Musculus while the sequence alignment of both proteins is depicted in Figure B.
